# Supplementary material for: Four Novel PAX9 Variants and the PAX9-Related Non-Syndromic Tooth Agenesis Patterns
Source: MDPI journal article supplement (doi:10.3390/ijms23158142), 2022-07-24
Supplement: s1 [file s1]

**Table S1 Primers used for PCR amplification and PCR conditions**

| Exon |         | Primer (5'-3')        | Annealing T (°C) |
|------|---------|-----------------------|------------------|
| 2    | Forward | GGACAGCCCCAGTAGTTAGTA | 60°C             |
|      | Reverse | AAAGGAAAAAGCCTCAGGTGG |                  |
| 3    | Forward | AAGGTCTAAGCCCTCCAGCT  | 60°C             |
|      | Reverse | CAGTCCACGAAGGATCTG    |                  |

**Table S2. Summary of human PAX9 variants associated with non-syndromic oligodontia**

| Exon      | Nucleotide change | Protein change | Type of variation   |      | Right quadrants |   |   |   |   |   |   |   | Left quadrants |   |   |   |   |   |   |   | Reference                        |
|-----------|-------------------|----------------|---------------------|------|-----------------|---|---|---|---|---|---|---|----------------|---|---|---|---|---|---|---|----------------------------------|
|           |                   |                |                     | Max  | 8               | 7 | 6 | 5 | 4 | 3 | 2 | 1 | 1              | 2 | 3 | 4 | 5 | 6 | 7 | 8 |                                  |
|           |                   |                |                     | Mand | 8               | 7 | 6 | 5 | 4 | 3 | 2 | 1 | 1              | 2 | 3 | 4 | 5 | 6 | 7 | 8 |                                  |
| 2<br>(PD) | c.218_219insG     | p.Ser74fs      | frameshift mutation |      | *               | * | * | * | * |   |   |   |                |   |   | * | * | * | * | * | Stockton (2000) Nat Genet 24, 18 |
|           |                   |                |                     |      | *               | * | * | * |   |   |   |   | *              |   |   |   | * | * | * | * |                                  |
|           |                   |                |                     |      | *               | * | * | * |   |   |   |   |                |   |   |   | * | * | * | * |                                  |
|           |                   |                |                     |      | *               | * | * | * |   |   |   |   |                |   |   |   | * | * | * | * |                                  |
|           |                   |                |                     |      | *               | * | * | * |   |   |   |   |                |   |   |   | * | * | * | * |                                  |
|           |                   |                |                     |      | *               | * |   |   |   |   |   |   |                |   |   |   |   |   | * | * |                                  |
|           |                   |                |                     |      | *               | * | * | * |   |   |   |   |                |   |   |   | * | * | * | * |                                  |
|           |                   |                |                     |      | *               | * |   |   |   |   |   |   |                |   |   |   |   |   | * | * |                                  |
|           |                   |                |                     |      | *               | * | * | * |   |   |   |   |                |   |   |   | * | * | * | * |                                  |
|           |                   |                |                     |      | *               | * | * | * |   |   |   | * | *              |   |   |   | * | * | * | * |                                  |
|           |                   |                |                     |      | *               | * | * | * |   |   |   |   |                |   |   |   | * | * | * | * |                                  |
|           |                   |                |                     |      | *               | * |   |   |   |   |   |   |                |   |   |   |   |   | * | * |                                  |
|           |                   |                |                     |      | *               | * |   |   |   |   |   |   |                |   |   |   |   |   | * | * |                                  |
|           |                   |                |                     |      | *               | * | * | * |   |   |   |   |                |   |   |   | * | * | * | * |                                  |
|           |                   |                |                     |      | *               |   |   |   |   |   |   |   | *              |   |   |   |   |   |   | * |                                  |
|           |                   |                |                     |      | *               | * | * | * |   |   |   |   |                |   |   |   | * | * | * | * |                                  |
|           |                   |                |                     |      | *               | * |   |   |   |   |   | * | *              |   |   |   |   |   | * | * |                                  |
|           |                   |                |                     |      | *               | * |   |   |   |   |   |   |                |   |   |   |   | * | * | * |                                  |
|           |                   |                |                     |      | *               | * | * | * |   |   |   |   |                |   |   |   |   |   | * | * |                                  |

|           |                                |            |                        |           |           |            |                      |   |   |   |   |   |   |   |   |   |   |   |   |   |
|-----------|--------------------------------|------------|------------------------|-----------|-----------|------------|----------------------|---|---|---|---|---|---|---|---|---|---|---|---|---|
| 2<br>(PD) | c.340A > T                     | p.Lys114*  | nonsense<br>mutation   |           | *         | *          | *                    | * |   |   | * |   |   | * |   |   | * | * | * | * |
|           |                                |            |                        |           | *         | *          | *                    |   |   |   |   |   |   | * | * | * | * |   |   |   |
|           |                                |            |                        |           | *         | *          |                      |   |   | * |   | * |   |   |   | * | * |   |   |   |
|           |                                |            |                        |           | *         | *          |                      |   |   |   | * |   |   |   |   | * | * |   |   |   |
|           |                                |            |                        |           | ?         | *          | *                    | * |   |   |   |   | * |   |   | * | * | * | ? |   |
|           |                                |            |                        |           | ?         | *          | *                    |   |   |   |   |   |   | * | * | * | * | ? |   |   |
|           | 44-100 kb incl.<br>entire gene |            | deletion               |           | *         | *          | *                    | * | * |   | * |   |   |   | * | * | * | * | * |   |
|           |                                |            |                        |           | *         | *          | *                    | * | * |   |   |   |   | * | * | * | * | * |   |   |
|           |                                |            |                        |           | *         | *          | *                    | * | * |   | * | * |   | * | * | * | * | * |   |   |
|           |                                |            |                        |           | *         | *          | *                    | * | * |   | * | * | * | * | * | * | * | * |   |   |
| 4         | c.792_793insC                  | p.Val265fs | frameshift<br>mutation |           | *         | *          | *                    | * | * |   | * |   |   | * | * | * | * | * | * |   |
|           |                                |            |                        |           | *         | *          |                      |   |   |   |   |   |   | * |   | * | * |   |   |   |
|           |                                |            |                        |           | *         | *          | *                    |   |   |   |   |   |   |   | * | * | * |   |   |   |
|           |                                |            |                        |           | *         | *          |                      |   |   |   |   |   |   |   |   | * | * |   |   |   |
|           |                                |            |                        |           | *         | *          | *                    |   |   | * |   |   |   |   | * | * | * |   |   |   |
|           |                                |            |                        |           | *         | *          |                      |   |   |   |   |   |   |   |   | * |   |   |   |   |
|           |                                |            |                        |           | *         | *          | *                    | * |   |   |   |   |   | * | * | * | * |   |   |   |
|           |                                |            |                        |           | *         | *          |                      |   |   | * | * |   |   |   | * |   | * |   |   |   |
|           |                                |            |                        |           | *         | *          | *                    | * |   |   |   |   |   | * | * | * | * |   |   |   |
|           |                                |            |                        |           | *         | *          |                      |   |   |   |   |   |   |   |   | * |   |   |   |   |
|           |                                |            |                        |           | *         | *          | *                    |   |   |   |   |   |   |   | * | * | * |   |   |   |
|           |                                |            |                        |           | *         | *          | *                    | * |   |   | * | * |   |   |   | * | * |   |   |   |
|           |                                |            |                        |           | *         | *          | *                    | * |   |   |   |   |   |   | * | * | * |   |   |   |
|           |                                |            |                        |           | *         | *          | *                    | * |   |   |   |   |   |   | * | * | * |   |   |   |
|           |                                |            |                        |           | *         | *          | *                    | * |   |   |   |   |   |   | * | * | * |   |   |   |
|           |                                |            |                        | 2<br>(PD) | c.62T > C | p.Leu21Pro | missense<br>mutation |   | * | * | * | * |   | * |   | * | * | * | * | * |
|           | *                              | *          | *                      |           |           |            |                      | * |   |   | * |   |   | * | * | * | * |   |   |   |
|           | *                              | *          | *                      |           |           |            |                      |   | * |   |   |   | * |   | * | * | * |   |   |   |
|           | *                              | *          |                        |           |           |            |                      |   |   | * | * |   |   |   | * | * |   |   |   |   |
|           | *                              |            | *                      |           |           |            |                      | * |   |   |   |   | * | * |   | * |   |   |   |   |
|           | *                              | *          |                        |           |           |            |                      | * |   | * | * |   |   | * |   | * |   |   |   |   |
|           | *                              | *          | *                      |           |           |            |                      | * |   | * |   |   | * | * | * | * |   |   |   |   |
|           | *                              | *          | *                      | *         |           |            |                      | * |   |   | * | * | * |   |   |   |   |   |   |   |

Nieminen (2001)  
Eur J Hum Genet 9,  
743

Das (2002) Hum  
Genet 110, 371

Frazier-Bowers  
(2002) J Dent Res  
81, 129

Das (2003) Am J  
Med Genet 118A,  
35

|           |                                     |            |                        |  |   |   |   |   |   |   |   |   |   |   |   |   |   |   |
|-----------|-------------------------------------|------------|------------------------|--|---|---|---|---|---|---|---|---|---|---|---|---|---|---|
|           |                                     |            |                        |  | * | * | * |   | * | * |   |   |   | * |   |   |   | * |
|           |                                     |            |                        |  | * | * |   |   |   |   |   |   |   |   |   |   | * | * |
|           |                                     |            |                        |  | * |   |   |   |   | * |   |   | * |   |   |   |   | * |
|           |                                     |            |                        |  | * |   |   |   |   | * | * |   |   |   |   |   |   | * |
|           |                                     |            |                        |  | * | * | * | * |   |   |   |   |   |   | * | * | * | * |
|           |                                     |            |                        |  | * | * | * |   |   |   | * | * |   |   | * | * | * | * |
|           |                                     |            |                        |  | * | * | * | * |   |   |   |   |   |   | * | * | * | * |
|           |                                     |            |                        |  |   | * |   |   |   |   | * | * |   |   | * |   | * |   |
|           |                                     |            |                        |  | * | * | * |   |   |   |   |   |   |   |   | * | * | * |
|           |                                     |            |                        |  | * | * |   |   |   |   | * | * |   |   |   |   | * | * |
| 2<br>(PD) | c.175_183delG<br>ATACAAins28<br>8bp | p.Arg59fs  | frameshift<br>mutation |  | * | * | * | * |   |   |   |   |   |   | * | * | * | * |
|           |                                     |            |                        |  | * |   | * |   |   |   | * |   |   |   |   | * |   | * |
|           |                                     |            |                        |  | * | * | * | * |   |   |   |   |   |   | * | * | * | * |
|           |                                     |            |                        |  | * | * |   |   |   |   | * | * |   |   |   |   | * | * |
| 2<br>(PD) | c.271A > G                          | p.Lys91Glu | missense<br>mutation   |  | * | * |   | * |   |   |   |   |   |   | * |   | * | * |
|           |                                     |            |                        |  | * | * |   | * |   | * | * | * |   |   | * |   | * | * |
|           |                                     |            |                        |  |   |   |   |   | * |   |   | * |   |   |   |   |   |   |
|           |                                     |            |                        |  | * | * |   |   |   |   |   |   |   |   |   |   |   | * |
|           |                                     |            |                        |  | * |   |   |   |   |   |   |   |   |   |   |   |   | * |
|           |                                     |            |                        |  | * | * | * |   | * | * |   | * | * |   |   |   | * | * |
|           |                                     |            |                        |  | * | * |   |   |   | * | * |   |   |   |   |   | * | * |
|           |                                     |            |                        |  | * | * | * |   | * |   | * | * | * |   | * |   | * | * |
|           |                                     |            |                        |  | * | * |   | * |   | * | * |   |   |   | * |   | * | * |
|           |                                     |            |                        |  | * | * | * | * |   |   |   |   |   |   |   | * | * | * |
|           |                                     |            |                        |  | * |   |   |   |   |   |   |   |   |   |   |   |   | * |
| 2<br>(PD) | c.76C > T                           | p.Arg26Trp | missense<br>mutation   |  | * | * | * |   | * |   |   |   |   |   | * | * | * | * |
|           |                                     |            |                        |  | * | * |   | * |   | * | * | * | * |   |   |   | * | * |
|           |                                     |            |                        |  | * | * |   | * |   | * |   |   | * |   |   | * | * | * |
|           |                                     |            |                        |  | * | * |   | * |   |   |   | * |   |   | * |   | * | * |
|           |                                     |            |                        |  | ? | * | * | * |   | * |   | * |   |   | * | * | * | ? |
|           |                                     |            |                        |  | ? | * |   | * |   | * |   |   |   |   | * |   | * | ? |
| 2         | c.151G > A                          | p.Gly51Ser |                        |  | * |   |   | * |   | * |   | * | * |   | * |   |   | * |

Lammi (2003) Eur J  
Hum Genet 11, 866

|           |                            |            |                     |  |   |   |   |   |   |   |  |   |   |   |   |   |   |   |   |   |                                                               |
|-----------|----------------------------|------------|---------------------|--|---|---|---|---|---|---|--|---|---|---|---|---|---|---|---|---|---------------------------------------------------------------|
| (PD)      |                            |            | missense mutation   |  | * |   |   | * |   |   |  |   | * | * |   |   | * |   |   | * | Mostowska (2003)<br>Eur J Oral Sci 111,<br>272                |
| 2<br>(PD) | c.83G > C                  | p.Arg28Pro | missense mutation   |  | * | * | * | * |   | * |  |   |   | * |   |   | * | * | * | * | Jumlongras (2004)<br>Hum Genet 114,<br>242                    |
| 1         | c.1A > G                   | p.Met1Val  | missense mutation   |  | * | * | * | * | * |   |  |   |   |   |   | * | * | * | * | * | Klein (2005) J Dent<br>Res 84, 43                             |
| 2<br>(PD) | c.108_109insG              | p.Ile37fs  | frameshift mutation |  | * | * |   |   | * | * |  | * | * |   |   | * | * | * | * | * | Zhao (2005)<br>Zhonghua Kou<br>Qiang Yi Xue Za<br>Zhi 40, 266 |
| 2<br>(PD) | c.139C > T                 | p.Arg47Trp | missense mutation   |  | * | * | * |   |   | * |  |   | * | * |   |   | * | * | * | * |                                                               |
| 2<br>(PD) | c.259A > T                 | p.Ile87Phe | missense mutation   |  | * | * | * | * |   |   |  |   |   |   |   |   | * | * | * | * | Kapadia (2006) Eur<br>J Hum Genet 14,<br>403                  |
| 2         | c.619_621delAT<br>Cins24bp | p.Ile207fs | frameshift mutation |  | * | * | * | * |   |   |  |   |   |   |   |   | * | * | * | * | Mostowska (2006)<br>Eur J Hum Genet<br>14, 173                |
| 2         | c.433C > T                 | p.Gln145*  | nonsense mutation   |  | * | * | * |   |   |   |  | * | * |   | * | * | * | * | * | * | Hansen (2007) Eur<br>J Oral Sci 115, 330                      |

|            |                              |             |                   |           |               |            |                     |   |   |   |   |   |   |   |   |   |   |
|------------|------------------------------|-------------|-------------------|-----------|---------------|------------|---------------------|---|---|---|---|---|---|---|---|---|---|
|            |                              |             |                   |           | *             | *          | *                   | * |   |   |   |   |   | * |   | * | * |
|            |                              |             |                   |           | *             | *          |                     |   |   |   |   |   | * |   |   | * | * |
| 3          | c.718G > C                   | p.Ala240Pro | missense mutation |           |               |            |                     |   | * | * |   |   | * | * |   |   |   |
|            |                              |             |                   |           |               |            |                     |   | * | * | * |   | * | * | * |   |   |
| 2<br>(PD)  | c.16G > A                    | p.Gly6Arg   | missense mutation |           | *             |            |                     |   |   |   |   |   | * |   |   | * |   |
|            |                              |             |                   |           | *             |            |                     |   | * | * |   |   |   |   |   | * |   |
|            | c.128G > A and<br>c.129C > A | p.Ser43Lys  |                   |           | *             | *          | *                   |   | * |   |   |   | * |   | * | * | * |
|            |                              |             |                   |           | *             | *          | *                   |   |   |   |   |   |   | * | * |   |   |
|            |                              |             |                   |           | *             |            |                     |   | * |   |   |   | * |   | * |   |   |
|            |                              |             |                   | *         | *             |            |                     |   | * |   |   |   | * |   | * | * |   |
| 5'-<br>UTR | g.-1258G > A                 |             |                   |           | *             | *          | *                   |   |   |   |   |   |   | * | * | * | * |
|            |                              |             |                   |           | *             | *          | *                   |   |   |   |   | * |   | * | * | * |   |
|            |                              |             |                   |           | *             |            | *                   |   |   |   |   |   |   | * |   | * |   |
|            |                              |             |                   |           | *             |            | *                   |   |   |   |   |   |   | * |   | * |   |
|            |                              |             |                   |           | *             | *          | *                   |   |   |   |   |   |   | * | * | * |   |
|            |                              |             |                   |           | *             | *          | *                   |   |   |   |   | * |   | * | * | * |   |
|            |                              |             |                   |           | *             |            |                     |   |   |   |   |   |   |   | * | * |   |
|            |                              |             |                   |           | *             | *          |                     |   |   |   |   |   |   |   | * | * |   |
|            |                              |             |                   |           | *             |            | *                   | * |   | * | * |   |   | * | * | * |   |
|            |                              |             |                   |           | *             | *          | *                   |   |   |   |   |   |   | * | * | * |   |
|            |                              |             |                   |           | *             | *          | *                   |   |   |   |   | * |   | * | * | * |   |
|            |                              |             |                   |           | *             | *          | *                   |   |   |   |   |   |   | * | * | * |   |
|            |                              |             |                   |           | *             | *          | *                   | * |   | * | * |   | * | * | * | * |   |
|            |                              |             |                   |           | *             | *          | *                   | * |   | * | * |   | * | * | * | * |   |
|            |                              |             |                   |           | *             | *          | *                   | * |   | * | * |   | * | * | * | * |   |
|            |                              |             |                   | 2<br>(PD) | c.321_322insG | p.Ala108fs | frameshift mutation |   | * | * | * | * |   |   |   |   | * |
|            | *                            | *           | *                 |           |               |            |                     | * |   |   |   |   | * | * | * | * |   |
|            | *                            | *           | *                 |           |               |            |                     |   |   |   |   |   | * | * | * | * |   |
|            | *                            | *           | *                 |           |               |            |                     | * |   |   |   |   |   | * | * | * |   |
|            | *                            | *           | *                 |           |               |            |                     | * |   |   |   |   |   | * | * | * |   |
|            | *                            | *           | *                 |           |               |            |                     | * |   |   |   |   |   | * | * | * |   |

Wang (2009) Hua  
Xi Kou Qiang Yi  
Xue Za Zhi 27, 606

Wang (2009) Cells  
Tissues Organs 189,  
80

Mendoza-Fandino  
(2011) Clin Genet  
80, 265

Suda (2011) J Dent  
Res 90, 382



|           |                      |            |                        |  |   |   |   |   |   |   |   |   |   |   |   |   |                                        |
|-----------|----------------------|------------|------------------------|--|---|---|---|---|---|---|---|---|---|---|---|---|----------------------------------------|
|           |                      |            |                        |  |   |   | * | * |   |   |   |   | * |   |   |   |                                        |
|           |                      |            |                        |  | * |   | * |   |   |   |   |   | * |   |   |   |                                        |
|           |                      |            |                        |  |   |   |   |   |   |   |   |   |   |   |   |   |                                        |
|           |                      |            |                        |  |   |   | * |   |   |   |   |   |   |   |   |   |                                        |
|           |                      |            |                        |  |   |   | * |   |   |   |   |   | * |   | * | * |                                        |
| 2<br>(PD) | c.353_354insTG<br>CC | p.Ser119fs | frameshift<br>mutation |  | ? |   | * | * |   |   |   | * | * | * | * | ? | Mostowska (2013)<br>Clin Genet 84, 429 |
|           |                      |            |                        |  | ? | * |   |   |   |   | * | * |   |   | * | ? |                                        |
| 2<br>(PD) | c.73-75delATC        | p.Ile25del | frameshift<br>mutation |  | * | * | * |   |   |   |   |   |   | * | * | * |                                        |
|           |                      |            |                        |  | * | * |   |   |   |   |   |   |   |   | * | * |                                        |
| 2<br>(PD) | c.146C > T           | p.Ser49Leu | missense<br>mutation   |  | * | * | * | * |   |   |   |   |   | * | * | * | *                                      |
|           |                      |            |                        |  | * | * |   |   |   |   | * | * |   |   | * | * |                                        |
| IVS2      | g.9527G > T          |            | splicing               |  | * | * | * | * |   |   | * |   | * |   | * | * | *                                      |
|           |                      |            |                        |  | * | * |   |   |   |   | * |   |   |   | * | * | *                                      |
|           |                      |            |                        |  | * | * | * | * |   |   | * |   | * |   | * | * | *                                      |
|           |                      |            |                        |  | * | * |   |   |   |   |   |   |   |   | * | * | *                                      |
| 2<br>(PD) | c.59C > T            | p.Pro20Leu | missense<br>mutation   |  | * | * |   | * |   | * | * |   | * | * | * | * | *                                      |
|           |                      |            |                        |  | * | * |   | * |   | * |   | * | * | * | * | * | *                                      |
|           |                      |            |                        |  | * |   |   |   |   | * |   | * |   |   |   |   | *                                      |
|           |                      |            |                        |  | * |   |   |   |   | * |   | * |   |   |   |   | *                                      |
|           |                      |            |                        |  | * |   |   |   | * | * |   | * | * | * | * | * | *                                      |
|           |                      |            |                        |  | * |   |   |   | * |   | * |   | * |   |   |   | *                                      |
| 2         | c.592_596dup         | p.Asp200fs | frameshift<br>mutation |  | * | * | * | * |   | * |   |   | * |   | * | * | *                                      |
|           |                      |            |                        |  | * | * |   | * |   | * | * |   |   |   | * | * | *                                      |
|           |                      |            |                        |  | * | * |   |   |   | * |   |   | * |   | * | * | *                                      |
|           |                      |            |                        |  | * | * |   |   |   | * | * |   |   |   | * | * | *                                      |
|           |                      |            |                        |  | * | * | * | * | * |   |   |   | * | * | * | * | *                                      |
|           |                      |            |                        |  | * |   |   |   |   | * | * |   |   |   |   |   | *                                      |
| 1         | c.2T > G             | p.Met1Arg  | missense<br>mutation   |  | * | * | * |   |   | * | * | * | * | * | * | * | *                                      |
|           |                      |            |                        |  | * | * | * |   |   | * | * |   |   | * | * | * | *                                      |
|           |                      |            |                        |  | * | * | * | * |   |   |   |   | * | * | * | * | *                                      |

|           |              |             |                        |  |                          |   |   |   |   |   |   |   |   |   |   |   |   |   |
|-----------|--------------|-------------|------------------------|--|--------------------------|---|---|---|---|---|---|---|---|---|---|---|---|---|
|           |              |             |                        |  | *                        | * | * |   |   |   |   |   |   |   | * | * | * |   |
|           |              |             |                        |  | *                        | * | * | * |   |   |   |   | * |   | * | * | * |   |
|           |              |             |                        |  | *                        | * | * |   |   |   |   |   |   |   | * | * | * |   |
|           |              |             |                        |  | *                        | * | * | * |   |   | * | * |   |   | * |   | * | * |
|           |              |             |                        |  | *                        | * |   | * | * |   | * | * |   |   | * | * | * | * |
|           |              |             |                        |  | *                        | * | * | * |   |   |   |   |   |   | * | * | * | * |
|           |              |             |                        |  | *                        | * |   |   |   |   | * | * |   |   |   | * | * | * |
| 2<br>(PD) | g.10672A > T | p.Asn116Ile | missense<br>mutation   |  |                          |   |   |   |   | * |   |   |   |   |   |   |   |   |
|           |              |             |                        |  |                          |   |   |   |   |   |   |   |   |   |   |   |   |   |
|           |              |             |                        |  |                          |   | * |   |   |   |   |   |   |   |   |   |   |   |
| 2<br>(PD) | c.289_296del | p.Ile97fs   | frameshift<br>mutation |  | Cannot find more details |   |   |   |   |   |   |   |   |   |   |   |   |   |
| 1         | c.3G > A     | p.Met1Ile   | missense<br>mutation   |  | *                        | * | * | * | * | * | * | * | * | * | * | * | * | * |
|           |              |             |                        |  | *                        | * | * |   |   |   | * | * |   |   | * | * | * | * |
|           |              |             |                        |  | *                        | * |   | * |   |   |   | * |   |   | * | * | * | * |
|           |              |             |                        |  | *                        | * | * |   |   |   |   |   | * |   | * | * | * | * |
|           |              |             |                        |  | *                        | * | * | * |   |   | * | * |   | ? | * | * | * | * |
|           |              |             |                        |  | *                        |   | * |   |   |   |   |   |   |   | * | * | * | * |
|           |              |             |                        |  | *                        | * |   |   | * |   |   |   | * |   | * | * | * | * |
|           |              |             |                        |  | *                        | * |   |   |   | * |   |   |   |   | * | * | * | * |
|           |              |             |                        |  | *                        | * | * | * |   |   |   | * |   |   | * | * | * | * |
|           |              |             |                        |  | *                        | * | * | * |   |   |   |   |   |   | * | * | * | * |
|           |              |             |                        |  | *                        | * |   | * |   |   |   |   |   |   | * | * | * | * |
|           |              |             |                        |  | *                        | * |   |   |   |   | * | * |   |   | * | * | * | * |
| 2<br>(PD) | c.76C > T    | p.Arg26Trp  | missense<br>mutation   |  | *                        | * |   |   |   |   | * | * |   |   | * | * | * | * |
|           |              |             |                        |  | *                        |   |   |   |   | * | * |   |   | * |   | * | * | * |
| 2<br>(PD) | c.140G > C   | c.140G>C    | missense<br>mutation   |  | *                        | * | * | * | * |   |   |   |   | * | * | * | * | * |
|           |              |             |                        |  | *                        | * | * | * | * |   | * | * | * |   | * | * | * | * |
| 2<br>(PD) | c.146delC    | p.Ser49fs   | frameshift<br>mutation |  | *                        | * | * |   | * | * |   |   |   |   | * | * | * | * |
|           |              |             |                        |  | *                        | * |   |   | * | * | * |   |   |   | * | * | * | * |
| 2<br>(PD) | c.167T > C   | p.Ile56Asn  | missense<br>mutation   |  | *                        | * | * | * |   |   |   |   |   | * | * | * | * | * |
|           |              |             |                        |  | *                        |   | * |   |   |   |   |   |   |   | * | * | * | * |
| 2<br>(PD) | c.185_189dup | p.Gly64fs   | frameshift<br>mutation |  | *                        | * |   |   | * |   |   | * |   |   | * | * | * | * |
|           |              |             |                        |  | *                        | * |   |   | * |   |   | * |   |   | * | * | * | * |
| 2         | c.194C > A   | p.Ser65*    |                        |  | *                        | * | * | * | * |   |   | * | * | * | * | * | * | * |

Shahid (2016) Eur J  
Med Genet 59, 377

Yu (2016) Am J  
Hum Genet 99, 195

Sarkar (2017) Gene  
635, 69

Wong (2018) J Dent  
Res 97, 155



|            |                                              |                            |                     |  |                          |   |   |   |   |   |   |   |   |   |   |   |   |   |   |
|------------|----------------------------------------------|----------------------------|---------------------|--|--------------------------|---|---|---|---|---|---|---|---|---|---|---|---|---|---|
| (PD)       |                                              |                            | nonsense mutation   |  |                          | * | * | * |   |   | * | * |   |   | * | * | * |   |   |
| 2 (PD)     | c.218dupG                                    | p.Ser74fs                  | frameshift mutation |  |                          | * | * | * | * |   | * |   | * |   | * | * | * | * |   |
| 2 (PD)     | c.256_262dup                                 | p.Arg88fs                  | frameshift mutation |  |                          | * | * | * |   |   |   |   |   |   | * | * | * |   |   |
| 2 (PD)     | c.271A > T                                   | p.Lys91*                   | c                   |  |                          | * | * | * |   | * |   | * | * | * |   | * | * | * |   |
| 2 (PD)     | c.322G > C                                   | p.Ala108Pro                | missense mutation   |  |                          | * |   |   |   |   | * | * |   |   |   | * | * | * |   |
| 2          | c.592delG                                    | p.Val198fs                 | frameshift mutation |  | Cannot find more details |   |   |   |   |   |   |   |   |   |   |   |   |   |   |
| 1          | c.2T > A                                     | p.Met1*                    | nonsense mutation   |  | *                        | * | * | * | * |   |   |   |   | * | * | * | * | * | * |
|            |                                              |                            |                     |  | *                        | * | * | * | * |   |   |   |   | * | * | * | * | * | * |
|            |                                              |                            |                     |  | *                        | * | * | * |   | * |   |   |   | * | * | * | * |   |   |
|            |                                              |                            |                     |  | *                        |   |   |   |   | * | * |   |   |   |   |   | * |   |   |
|            |                                              |                            |                     |  | *                        | * | * | * |   | * |   | * |   |   | * | * | * | * | * |
| 2(PD)<br>3 | c.331G > A and<br>c.718G > C                 | p.Val111Met<br>p.Ala240Pro | missense mutation   |  |                          | * | * |   | * |   | * |   |   | * |   |   |   |   |   |
| 2 (PD)     | c.211_212insA                                | p.Ile71fs                  | frameshift mutation |  |                          | * | * |   | * | * |   | * | * | * | * | * | * | * | * |
| 2 (PD)     | c.229C > G                                   | p.Arg77Gly                 | missense mutation   |  |                          | * |   |   | * |   | * |   | * | * | * |   | * | * | * |
| 2 (PD)     | c.236_237insAC                               | p.Ter80fs                  | frameshift mutation |  |                          | * | * | * | * |   |   |   | * |   | * | * | * | * | * |
| 2 (PD)     | c.59C > T                                    | p.Pro20Leu                 | missense mutation   |  |                          | * | * |   | * |   | * | * |   |   | * |   | * | * | * |
| 2 (PD)     | c.230G>A                                     | p.Arg77Gln                 | missense mutation   |  |                          | * | * | * |   |   |   |   |   |   |   | * | * | * | * |
|            |                                              |                            |                     |  |                          | * | * | * |   |   |   |   |   |   |   | * | * | * | * |
|            |                                              |                            |                     |  |                          | * | * | * |   |   |   |   |   |   |   | * | * | * | * |
|            |                                              |                            |                     |  |                          | * | * | * |   |   |   |   |   |   |   | * | * | * | * |
| 2          | c.491-<br>510delGCCCT<br>ATCACGGCG<br>GCGGCC | p.Pro165fs                 | frameshift mutation |  |                          | * | * | * | * |   | * | * | * | * | * | * | * | * | * |
|            |                                              |                            |                     |  |                          | * | * | * |   |   | * | * |   |   | * | * | * | * | * |
|            |                                              |                            |                     |  |                          | * | * | * |   |   | * |   |   | * | * | * | * | * | * |
|            |                                              |                            |                     |  |                          | * | * | * |   |   | * | * |   |   | * | * | * | * | * |

Koskinen (2019)  
Clin Oral Investig  
23, 4107

Zhang(2019) Oral  
Dis 25, 234

Sun(2021) Oral Dis  
27,1468

Intarak (2022) Eur J  
Oral Sci 130,2

Sun(2022) Oral Dis  
May 20

[illegible]
